the hemoptysis.<sup>3</sup> If hemoptysis occurs or new pulmonary changes near the catheter tip are seen, the catheter should be removed without delay.

KIE CHUL OHN, M.D.  
*Resident*  
JAMES E. COTTRELL, M.D.  
*Associate Professor*  
HERMAN TURNDORF, M.D.  
*Professor and Chairman*  
*Department of Anesthesiology*  
*New York University Medical Center*

560 First Avenue  
New York, New York 10016

## REFERENCES

1. Hagemeyer F, Storm CJ: Fan-shaped shadows due to pulmonary artery catheters: Heparin prophylaxis. *Br Med J* 2: 1124, 1977
2. Lapin ES, Murray JA: Hemoptysis with flow-directed cardiac catheterization. *JAMA* 220:1246, 1972
3. Chun GMH, Ellestad MH: Perforation of the pulmonary artery by Swan-Ganz catheter. *N Engl J Med* 284:1041-1042, 1972

(Accepted for publication June 22, 1979.)

Anesthesiology  
51:486, 1979

## Reductive Metabolism of Halothane and Hepatotoxicity

*To the Editor:*—Eger<sup>1</sup> rightly points out that the currently identified reductive metabolites of halothane have not been shown to be toxic in themselves. However, we have recently reported hepatic functional and morphologic abnormalities that accompany increases in concentrations of volatile reductive halothane metabolites in Fischer 344 rats subjected to enzyme induction and hypoxia.<sup>2-5</sup> Specifically, concentrations of 1,1-difluoro-2-chloroethylene (CDF) and 1,1,1-trifluoro-2-chloroethane (CTF) were low in the absence of abnormalities in hepatic function or morphology. However, a four- to eightfold increase in reductive metabolism of halothane resulted from enzyme induction and moderate hypoxia (oxygen, 14 per cent) and this was associated with hepatic necrosis in all animals at 24 hours after anesthesia; appropriate controls showed no such abnormalities. These findings satisfy accepted criteria for hepatic damage due to direct cellular injury. The formation of CDF and CTF could only proceed via an intermediate free radical or carbanion,<sup>4</sup> so it is most likely that these metabolites merely serve as a "marker" of reductive metabolism and that hepatic cellular injury results from the intermediate carbanion or free radical. These observations were made in an animal model with oxidative and reductive halothane metabolism similar to that of man, and the lesion described was similar to that previously reported in cases of presumed halothane hepatitis. Thus, the findings in our animal model have pertinence to the important question of hepatic effects of halothane in man.<sup>3,4</sup>

We found in man that reductive halothane metabolites were present in the exhaled air during halothane anesthesia with 100 per cent oxygen at concentrations

higher than those reported after anesthesia by Sharp *et al.*<sup>6</sup> Our studies also show that concentrations of volatile reductive halothane metabolites rapidly increase from the start of anesthesia, reach a plateau after one hour, and decline rapidly after anesthesia. In conclusion, there seems little doubt that the reductive metabolism of halothane has significance for human hepatic toxicity of halothane, and that the volatile reductive metabolites CDF and CTF are useful markers for reductive metabolism.

MICHAEL J. COUSINS, M.D., F.F.A.R.A.C.S.,  
F.F.A.R.C.S.

*Professor and Chairman*  
*Department of Anaesthesia and Intensive Care*  
*Flinders University of South Australia*  
*Flinders Medical Centre*  
*Adelaide, South Australia, Australia 5042*

## REFERENCES

1. Eger EI II: Dragons and other scientific hazards. *ANESTHESIOLOGY* 50:1, 1979
2. Cousins MJ, Sharp JH, Gourlay GK, et al: An animal model for halothane hepatotoxicity. *Clin Exp Pharmacol Physiol*, 1979 (in press)
3. Cousins MJ, Gourlay GK, Sharp JH, et al: Halothane hepatitis. *Lancet*, Dec 2, 1197, 1978
4. Cousins MJ, Sharp JH, Gourlay GK, et al: Hepatotoxicity and halothane metabolism in an animal model with application for human toxicity. *Anaesth Intensive Care* 7:9-24, 1979
5. Cousins MJ: Halothane and the liver: "Firm ground" at last? (editorial). *Anaesth Intensive Care* 7:5-8, 1979
6. Sharp JH, Trudell JR, Cohen EN: Volatile metabolites and decomposition products of halothane in man. *ANESTHESIOLOGY* 50:2-8, 1979

(Accepted for publication June 28, 1979.)
